# Supplementary material
Source: PubMed Central journal article supplement (PMC2575248)
Supplement: 0805560105_0805560105SI.pdf [file 0805560105_0805560105SI.pdf]

# Supporting Information

Udden *et al.* 10.1073/pnas.0805560105

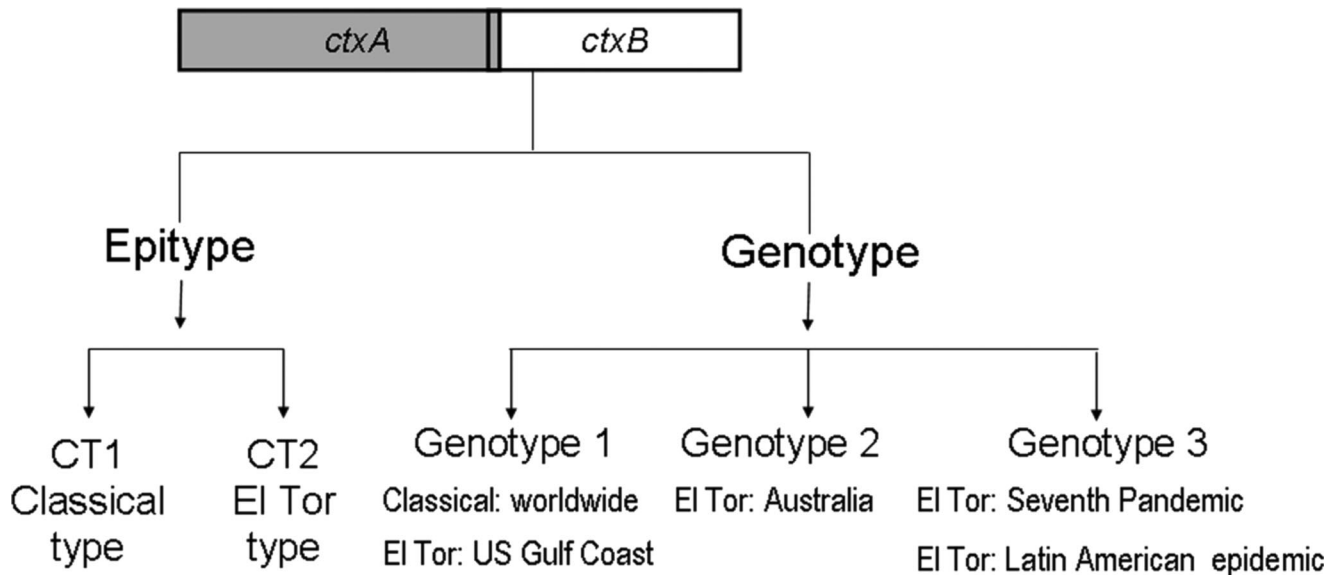

Fig. S1. Currently recognized epitypes (immunologic types) and genotypes of cholera toxin produced by *V. cholerae* O1.

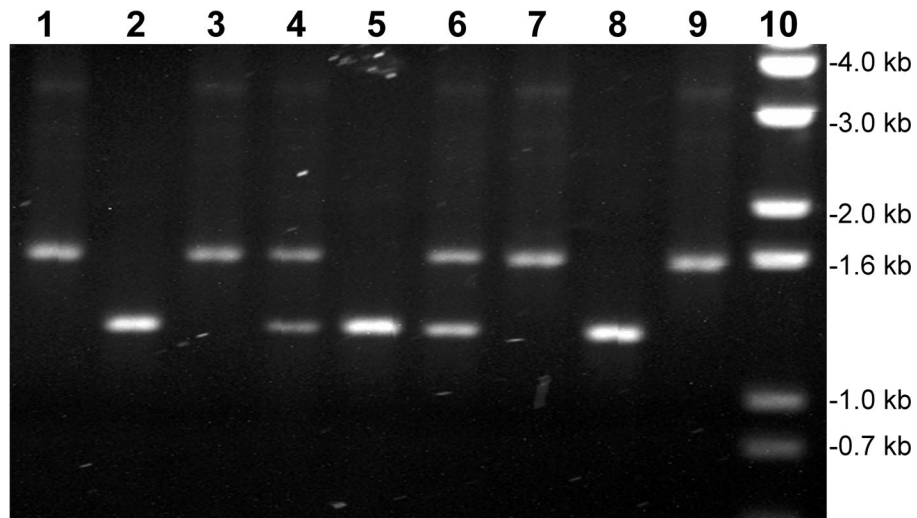

**Fig. S2.** Chitin-induced transformation resulting in replacement of the *ctxAB* operon in El Tor biotype strains by a genetically marked  $\approx 1.6$ -kb PCR amplicon derived from strain O395NT, consisting of a  $K_m^R$  determinant flanked by remnants of the *ctxAB* operon. Lane 1 shows a PCR amplicon derived from O395NT; lane 2, strain 2344–17 (native); lane 5, strain 2434–44 (native); lane 8, strain 2749–129 (native); lane 9, a derivative of strain 2749–129 carrying the  $K_m^R$  marker; and lane 10, molecular size markers corresponding to the 1-kb DNA Ladder Plus (Invitrogen). Lanes 3 and 4 show derivatives of strain 2344–17 carrying the  $K_m^R$  marker, and lanes 6 and 7 show derivatives of strain 2434–44 carrying the  $K_m^R$  marker.

**Table S1. Types of *rstR* gene of the CTX prophage and *tcpA* gene of the TCP pathogenicity island carried by environmental *V. cholerae* O1 and non-O1, non-O139 strains in Bangladesh**

| Serotype             | Number of isolates | Presence of CTX | Type of <i>rstR</i> gene <sup>†</sup> |                           |                            |                            | Type of <i>tcpA</i> gene <sup>†</sup> |                           |
|----------------------|--------------------|-----------------|---------------------------------------|---------------------------|----------------------------|----------------------------|---------------------------------------|---------------------------|
|                      |                    |                 | <i>rstR</i> <sup>Class</sup>          | <i>rstR</i> <sup>ET</sup> | <i>rstR</i> <sup>Cal</sup> | <i>rstR</i> <sup>Env</sup> | <i>tcpA</i> <sup>Class</sup>          | <i>tcpA</i> <sup>ET</sup> |
| Unknown <sup>‡</sup> | 3                  | +               | —                                     | —                         | —                          | +                          | +                                     | —                         |
| Unknown <sup>‡</sup> | 2                  | +               | —                                     | —                         | +                          | —                          | +                                     | —                         |
| Unknown <sup>‡</sup> | 5                  | —               | —                                     | —                         | —                          | —                          | +                                     | —                         |
| O141                 | 6                  | +               | +                                     | —                         | —                          | —                          | +                                     | —                         |
| O141                 | 9                  | —               | —                                     | —                         | —                          | —                          | —                                     | —                         |
| O1                   | 15                 | +               | —                                     | +                         | —                          | —                          | —                                     | +                         |
| O1                   | 3                  | —               | —                                     | —                         | —                          | —                          | —                                     | +                         |

These strains were identified as positive for CTX or TCP by screening a total of 254 *V. cholerae* non-O1, non-O139 strains and 18 *V. cholerae* O1 strains isolated from surface water.

<sup>†</sup>The types of *rstR* and *tcpA* genes were determined by DNA probes or PCR assays.

<sup>‡</sup>These are non-O1, non-O139 strains that did not react with the O141 antiserum.

**Table S2.** *V. cholerae* reference strains, plasmids, and phages used in the study

| Strain                                                                                                | Relevant characteristic                                                                                                                                                                               | Reference             |
|-------------------------------------------------------------------------------------------------------|-------------------------------------------------------------------------------------------------------------------------------------------------------------------------------------------------------|-----------------------|
| O395                                                                                                  | Classical Ogawa streptomycin-resistant strain                                                                                                                                                         | Laboratory collection |
| O395NT                                                                                                | Derivative of strain O395, in which the CTX element was marked with a kanamycin resistance determinant by marker exchange disrupting the <i>ctxAB</i> operon.                                         | 1                     |
| V47, V48, V49, V51                                                                                    | Toxigenic <i>V. cholerae</i> O141 clinical isolates carrying the CTX <sup>class</sup> prophage                                                                                                        | Laboratory collection |
| O141–2615, O141–2634                                                                                  | Toxigenic <i>V. cholerae</i> O141 environmental isolates                                                                                                                                              | This study            |
| O141–2615-Km, O141–2634-Km, V51-Km                                                                    | Derivatives of strains O141–2615, O141 2634, and V51 respectively, in which the CTX <sup>class</sup> prophage was marked by recombination of kanamycin marked PCR product derived from strain O395NT. | This study            |
| JSF141B $\phi$                                                                                        | Phage specific for <i>V. cholerae</i> O141 isolated from surface water in Bangladesh                                                                                                                  | This study            |
| C6706, C6706 $\Delta hapA$ , H072260482, MG116926, MJ1485, MJ1236, 2749129, 2749720, 2756332, 2684756 | Clinical isolates of toxigenic <i>V. cholerae</i> O1 El Tor strains                                                                                                                                   | Laboratory collection |
| 2344–11, 2344–16, 2344–17, 2434–44, 2434–47, 2434–49                                                  | Toxigenic <i>V. cholerae</i> O1 El Tor strains isolated from surface water in Bangladesh                                                                                                              | This study            |

1. Mekalanos JJ, et al. (1983) Cholera toxin genes: Nucleotide sequence, deletion analysis and vaccine development. *Nature* 306:551–557.
